# Supplementary material for: Thrombopoietin receptor is required for the oncogenic function of CALR mutants
Source: PubMed Central journal article supplement — Leukemia. 2016 Mar 4;30(8):1759–63. doi: 10.1038/leu.2016.32 (PMC4980558; doi:10.1038/leu.2016.32), 2016-03-04
Supplement: leu201632x2.pdf [file leu201632x2.pdf]

|    |   |                                                                                                                             |       |
|----|---|-----------------------------------------------------------------------------------------------------------------------------|-------|
| 15 | 1 | gctgcagaga agcagatgaa ggacaagcag gatgaggagc agaggc <del>ctaa-ggaaga</del> gaa gaggacaaga agcgtaaaga ggaagaagaa gctgaggata   | del12 |
|    | 2 | gctgcagaga agcagatgaa ggacaagcag gatgaggagc agaggcttaa ggaagaagaa gaggacaaga agcgtaaaga ggaagaagaa gctgaggata               | wt    |
| 16 | 1 | gctgcagaga agcagatgaa ggacaagcag gatgaggagc agaggcttaa ggaagaagaaA gaggacaaga agcgtaaaga ggaagaagaa gctgaggata              | ins1  |
|    | 2 | gctgcagaga agcagatgaa ggacaagcag gatgaggagc agaggcttaa ggaagaagaaA gaggacaaga agcgtaaaga ggaagaagaa gctgaggata              | ins1  |
| 17 | 1 | gctgcagaga agcagatgaa ggacaagcag gatgaggagc agaggcttaa ggaagaagGaa gaggacaaga agcgtaaaga ggaagaagaa gctgaggata              | ins1  |
|    | 2 | gctgcagaga agcagatgaa ggacaagcag gatgaggagc agaggcttaa ggaagaagaa gaggacaaga agcgtaaaga ggaagaagaa gctgaggata               | wt    |
| 18 | 1 | gctgcagaga agcagatgaa ggacaagcag gatgaggagc agaggcttaa ggaagaagGaa gaggacaaga agcgtaaaga ggaagaagaa gctgaggata              | ins1  |
|    | 2 | gctgcagaga agcagatgaa ggacaagcag gatgaggagc agaggcttaa ggaagaagaa gaggacaaga agcgtaaaga ggaagaagaa gctgaggata               | wt    |
| 19 | 1 | gctgcagaga agcagatgaa ggacaagcag gatgaggagc agaggcttaa ggaagaag <del>ga</del> a gaggacaaga agcgtaaaga ggaagaagaa gctgaggata | del2  |
|    | 2 | gctgcagaga agcagatgaa ggacaagcag gatgaggagc agaggcttaa ggaagaagaa gaggacaaga agcgtaaaga ggaagaagaa gctgaggata               | wt    |
